# Supplementary material
Source: publisher site journal article supplement (https://www.dovepress.com/article/568971)
Supplement: Supplementary file 1 [file 568971%20Revised%20Supplemental%20Materials.pdf]

Supplemental Table 1 Genotype of patients with MSP-related variants (N=29)

| Gene           | Patients         | Age /sex | Phenotypes   | DNA nucleotide change | Protein change          | Pathogenicity classification | ACMG evidence codes        |
|----------------|------------------|----------|--------------|-----------------------|-------------------------|------------------------------|----------------------------|
| <i>VCP</i>     | P1               | 37/m     | IBM          | c.705A>G              | p.R155H                 | Pathogenic                   | PM1+PM2+PP2+PP3+PP5        |
|                | P2               | 52/m     | IBM, PDB, PD | c.593T>G              | p.L198W                 | VUS, novel                   | PM1+PM2+PP5                |
|                | P3               | 48/m     | IBM          | c.1106T>C             | p.I369T                 | Likely pathogenic            | PM1+PM2+PP2+PP3            |
|                | P4               | 35/m     | ALS          | c.463C>T              | p.R155C                 | Pathogenic                   | PM1+PM2+PP2+PP3+PP5        |
|                | P5               | 49/m     | ALS, FTD     | c.464G>A              | p.R155H                 | Pathogenic                   | PM1+PM2+PP2+PP3+PP5        |
|                | P6               | 51/m     | ALS, FTD     | c.464G>A              | p.R155H                 | Pathogenic                   | PM1+PM2+PP2+PP3+PP5        |
| <i>HNRNPA1</i> | P7               | 42/m     | IBM          | c.644A>G              | p.N215S                 | VUS                          | PM1+PM2+BP3                |
|                | P8               | 12/m     | IBM          | c.961T>G<br>c.1117T>G | p.*321Eext*6<br>p.X373E | VUS<br>VUS                   | PM2+PM4+PP3<br>PM2+PM4+PP3 |
| <i>SQSTM1</i>  | P9               | 27/f     | IBM          | c.5C>T                | p.A2V                   | VUS                          | PM1                        |
|                | P10 <sup>a</sup> | 45/f     | IBM          | c.295A>C              | p.I15L                  | VUS                          | PM1+PP3                    |
|                | P11              | 71/m     | ALS          | c.1210A>C             | p.M404L                 | VUS                          | PM2+PM5+PP3                |
| <i>MATR3</i>   | P12              | 41/m     | IBM          | c. 254 C >G           | p.S85C                  | Pathogenic                   | PM1+PM2+PP3+PP5            |
|                | P13              | 43/m     | IBM          | c.254C>G              | p.S85C                  | Pathogenic                   | PM1+PM2+PP3+PP5            |
|                | P14 <sup>b</sup> | 26/f     | ALS          | c.1141A>G             | p.K381E                 | VUS, novel                   | PM1                        |
| <i>OPTN</i>    | P15              | 65/f     | ALS, FTD     | c.1546G>C             | p.E516Q                 | Likely Pathogenic            | PM1+PM2+PP3+PP5+BP1        |
|                | P16              | 44/m     | ALS, FTD     | c.531del              | p.F178Lfs*15            | VUS, novel                   | PM1                        |
|                | P17 <sup>c</sup> | 76/f     | ALS          | c.407C>T              | p.A136V                 | VUS                          | PM1+PM2+PP5                |
|                | P18              | 70/m     | ALS          | c.1634G>A             | p.R545Q                 | VUS                          | PM1+PP5                    |

|               |                  |      |               |           |         |            |                      |
|---------------|------------------|------|---------------|-----------|---------|------------|----------------------|
|               | P19              | 68/m | ALS           | c.1634G>A | p.R545Q | VUS        | PM1+PP5              |
| <i>ANXA11</i> | P20              | 55/m | IBM, ALS, FTD | c.118G>T  | p.D40Y  | Pathogenic | PS3+ PM1+PM2+PP2+PP5 |
|               | P21              | 66/m | ALS, FTD      | c.119A>G  | p.D40G  | Pathogenic | PS3+ PM1+PM2+PP2+PP5 |
|               | P22              | 33/f | ALS           | c.119A>G  | p.D40G  | Pathogenic | PS3+ PM1+PM2+PP2+PP5 |
|               | P23              | 61/f | ALS           | c.1156C>T | p.R386W | VUS        | PM1+PP2              |
|               | P24              | 33/m | ALS           | c.1156C>T | p.R386W | VUS        | PM1+PP2              |
|               | P25              | 53/f | ALS           | c.1471G>A | p.G491R | VUS        | PM2+PP2              |
|               | P26              | 52/m | ALS           | c.962C>A  | p.T321N | VUS        | PM6+PP2              |
|               | P27 <sup>d</sup> | 36/m | ALS           | c..962C>A | p.T321N | VUS        | PM6+PP2              |
|               | P28              | 66/m | ALS, FTD      | c.107C>G  | p.P36R  | VUS        | PM1+PM2+PP2          |
|               | P29              | 36/m | ALS           | c.289C>T  | p.Q97X  | VUS, novel | PSV1+PP3             |

Abbreviations: ALS, amyotrophic lateral sclerosis; IBM, inclusion body myopathy; PDB, Paget disease of the bone; FTD, frontotemporal dementia; VCP, valosin-containing protein; hnRNPA1, heterogeneous nuclear ribonucleoprotein A1; MATR3, matrin 3; MSP, multisystem proteinopathy; SQSTM1, sequestosome 1; ANXA11, annexin A11; OPTN, Optineurin; MAPT, Microtubule Associated Protein Tau; FTD, frontotemporal dementia; IBM, inclusion body myopathy; VUS, variant of uncertain significant; ACMG guideline,

a The patient also presented with mild cognitive impairment with Montreal Cognitive Assessment (MoCA, 22/30).

b The patient also carried mutation of ANXA11, c.1454G>A, p.G491R; VUS; FUS, NM\_004960.4, c.1454delG, p.R485fs, VUS.

c The patient also carried mutation of MAPT, c.2086G>A, p.G696S, VUS.

d The patient also carried mutation of FUS, NM\_004960.4, c.1561C>G, p.R521G, likely pathogenic.

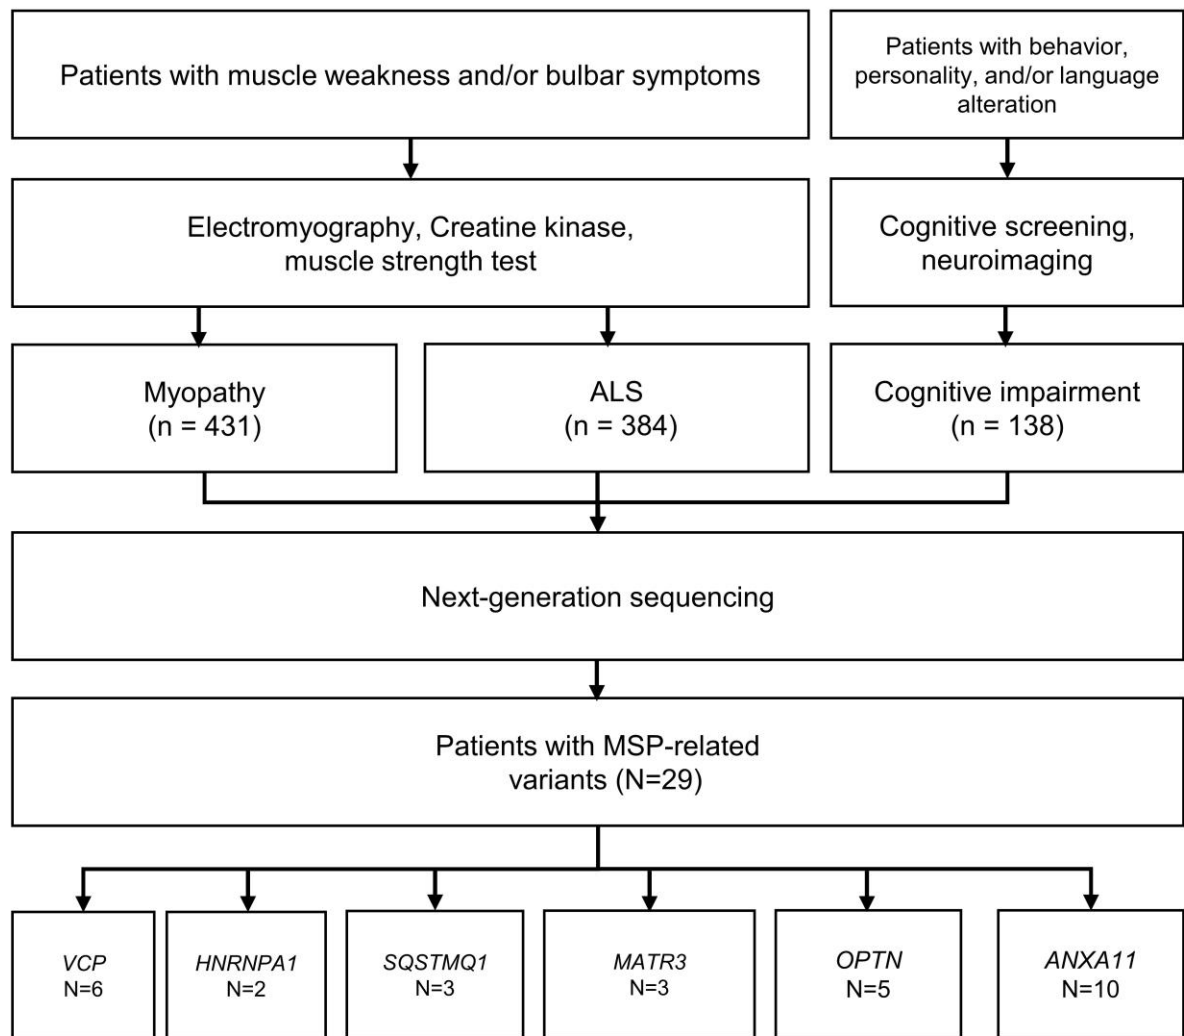

**Supplemental Figure 1.** Study workflow. This retrospective study enrolled 29 patients with MSP-related variants by next-generation sequencing.

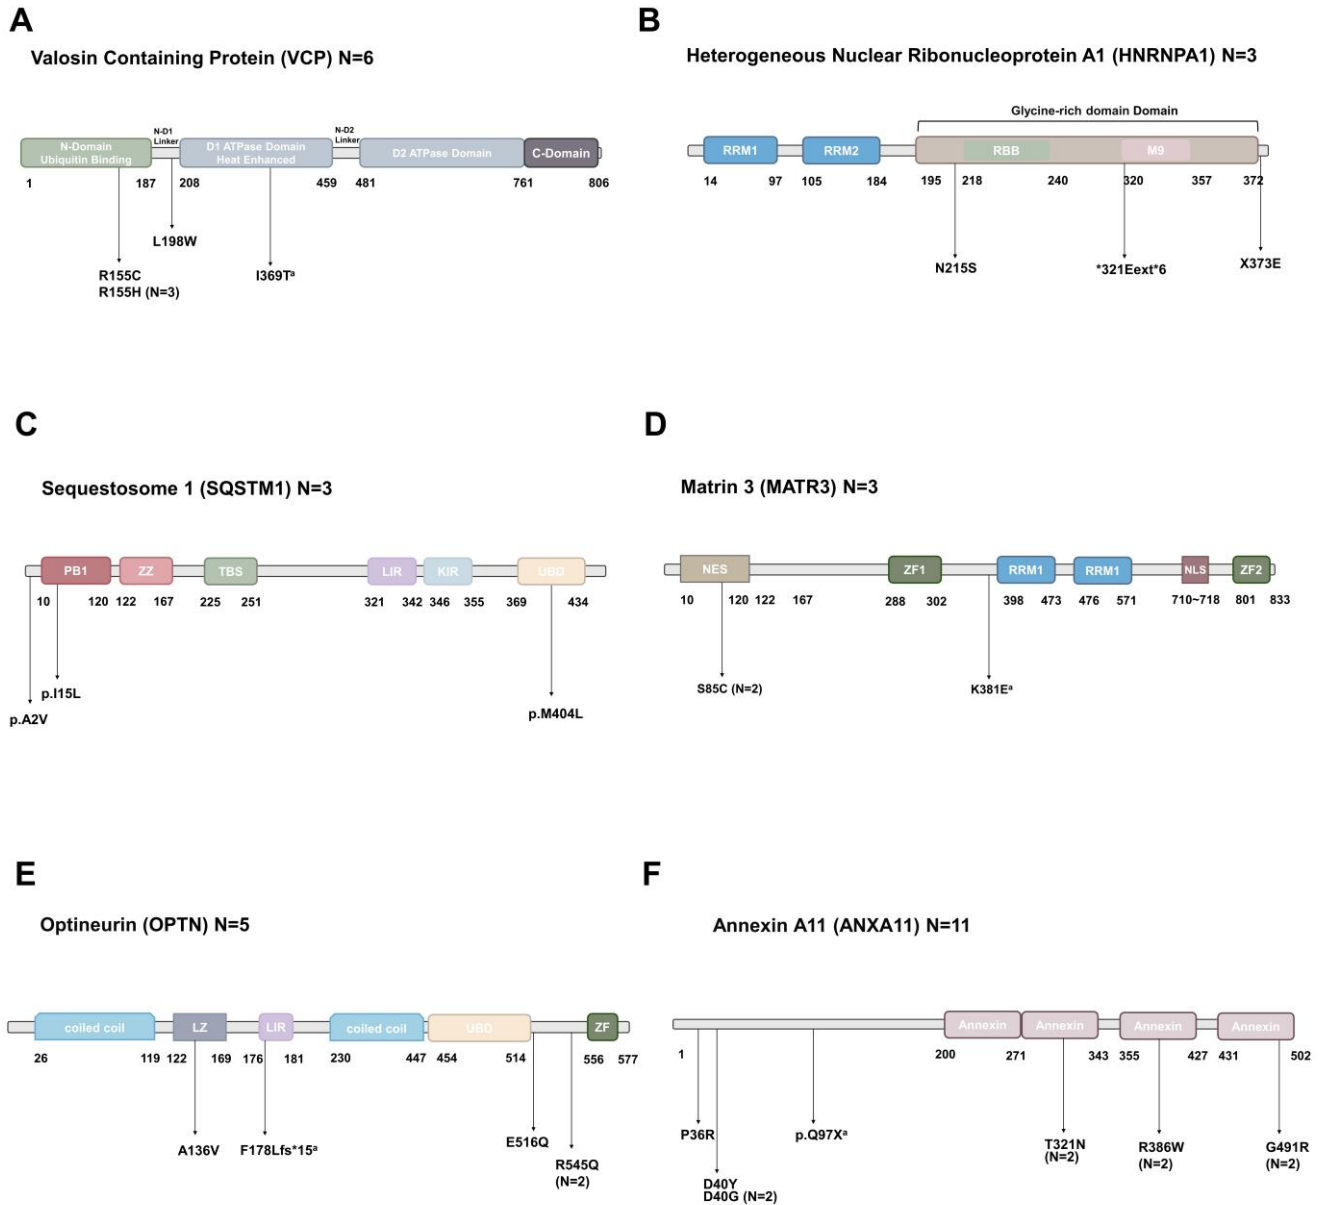

**Supplemental Figure 2.** Diagram of the protein structures and variants sites of six MSP-related-genes in this study (A-F). Two RNA recognition motifs (RRM 1 and 2); RNA-binding box, RBB; nuclear localization signal M9; The Phox and Bem1 (PB1) domain; The ZZ-type zinc finger (ZZ); the tumor necrosis factor receptor-associated factor 6 (TRAF6)-binding domain (TBS); the LC3-interacting region (LIR) domain; KEAP1 interacting region (KIR) domain; The ubiquitin (UB)-associated (UBA) domain, UBD; Nuclear export signal (NES); Zinc finger domains (ZF), nuclear localization signal (NLS); CC, coiled coil; LIR, LC3 interacting region; LZ, leucine zipper; a, The variants were novel.
